# Supplementary material for: The crystal structure of unmodified tRNAPhe from Escherichia coli
Source: PubMed Central journal article supplement — Nucleic Acids Res. 2010 Mar 4;38(12):4154–62. doi: 10.1093/nar/gkq133 (PMC2896525; doi:10.1093/nar/gkq133), 2010-03-04
Supplement: gkq133_1.pdf [file gkq133_1.pdf]

## Supplementary information

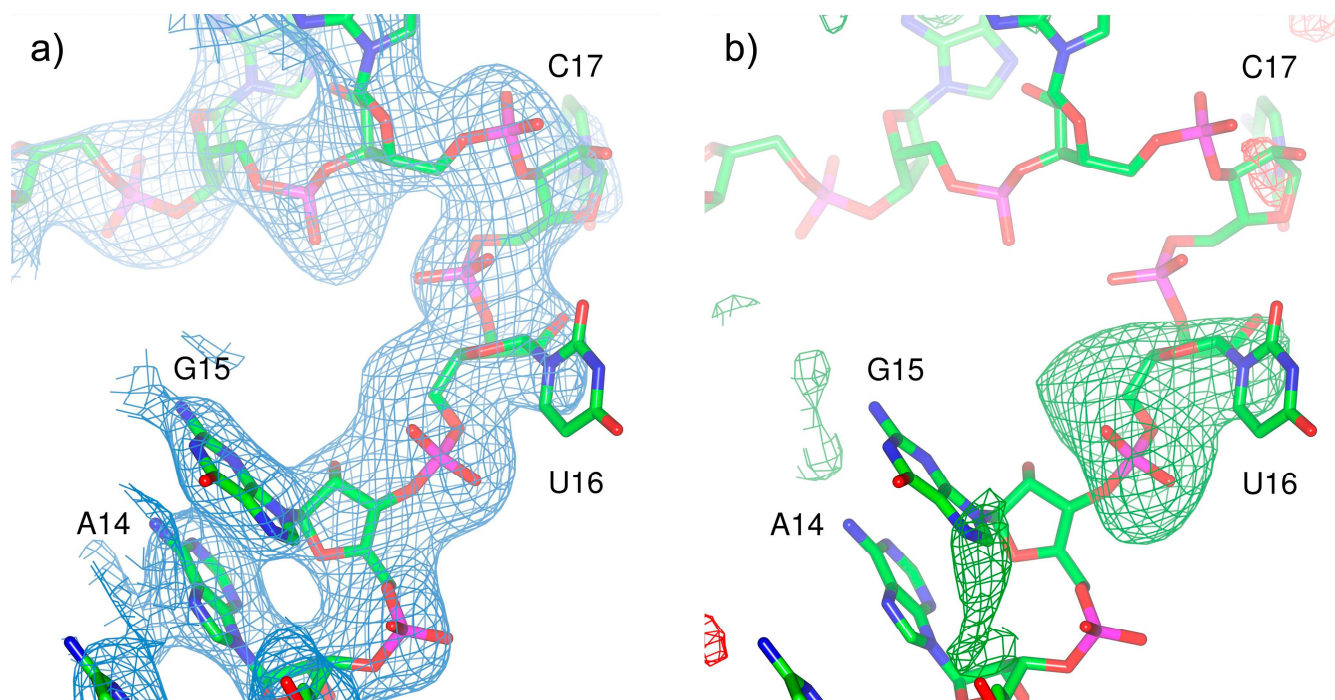

**Supplementary figure 1.** D-loop conformation. The final refined model is overlaid with electron density maps. **(a)** The  $2m|F_o|-D|F_c|$  map is contoured at  $1\sigma$ . **(b)** The  $m|F_o|-D|F_c|$  map calculated with U16 omitted is contoured at  $3\sigma$ .

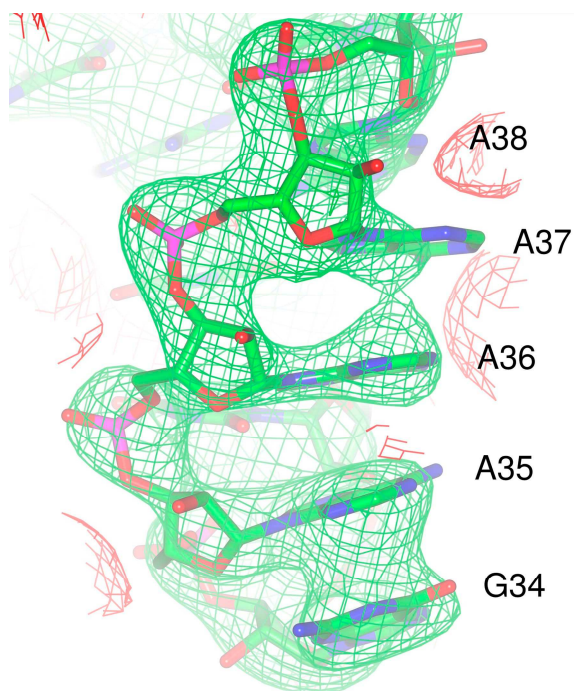

**Supplementary figure 2.** Conformation of the anticodon stem loop of tRNA. The  $m|F_o|-D|F_c|$  map contoured at  $2\sigma$  was calculated with nucleotides 28-42 omitted from the model

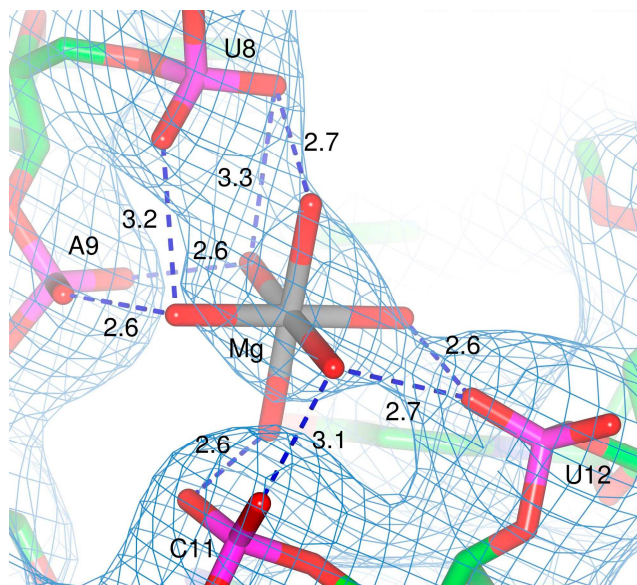

**Supplementary figure 3.** The coordination of the hydrated  $\text{Mg}^{2+}$  ion. The corresponding  $2m|F_o|-D|F_c|$  electron density map is contoured at  $1\sigma$ . The hydrogen bonds between the phosphate groups and the water molecules are depicted by dashed blue lines, along with the distances in Å.
